# Supplementary material
Source: MDPI journal article supplement (https://www.mdpi.com/2076-3417/7/6/581)
Supplement: s1 [file s1]

# Cycling Segments Multimodal Analysis and Classification Using Neural Networks

Aleš Procházka, Saeed Vaseghi, Hana Charvátová, Ondřej Ľupa, Oldřich Vyšata

A map of the expedition across the Andes mountains showing the route 5694 km long with 48 segments and the altitude profile recorded by the GPS system during 272.2 hours of cycling through 5 countries, as specified in Table 1.

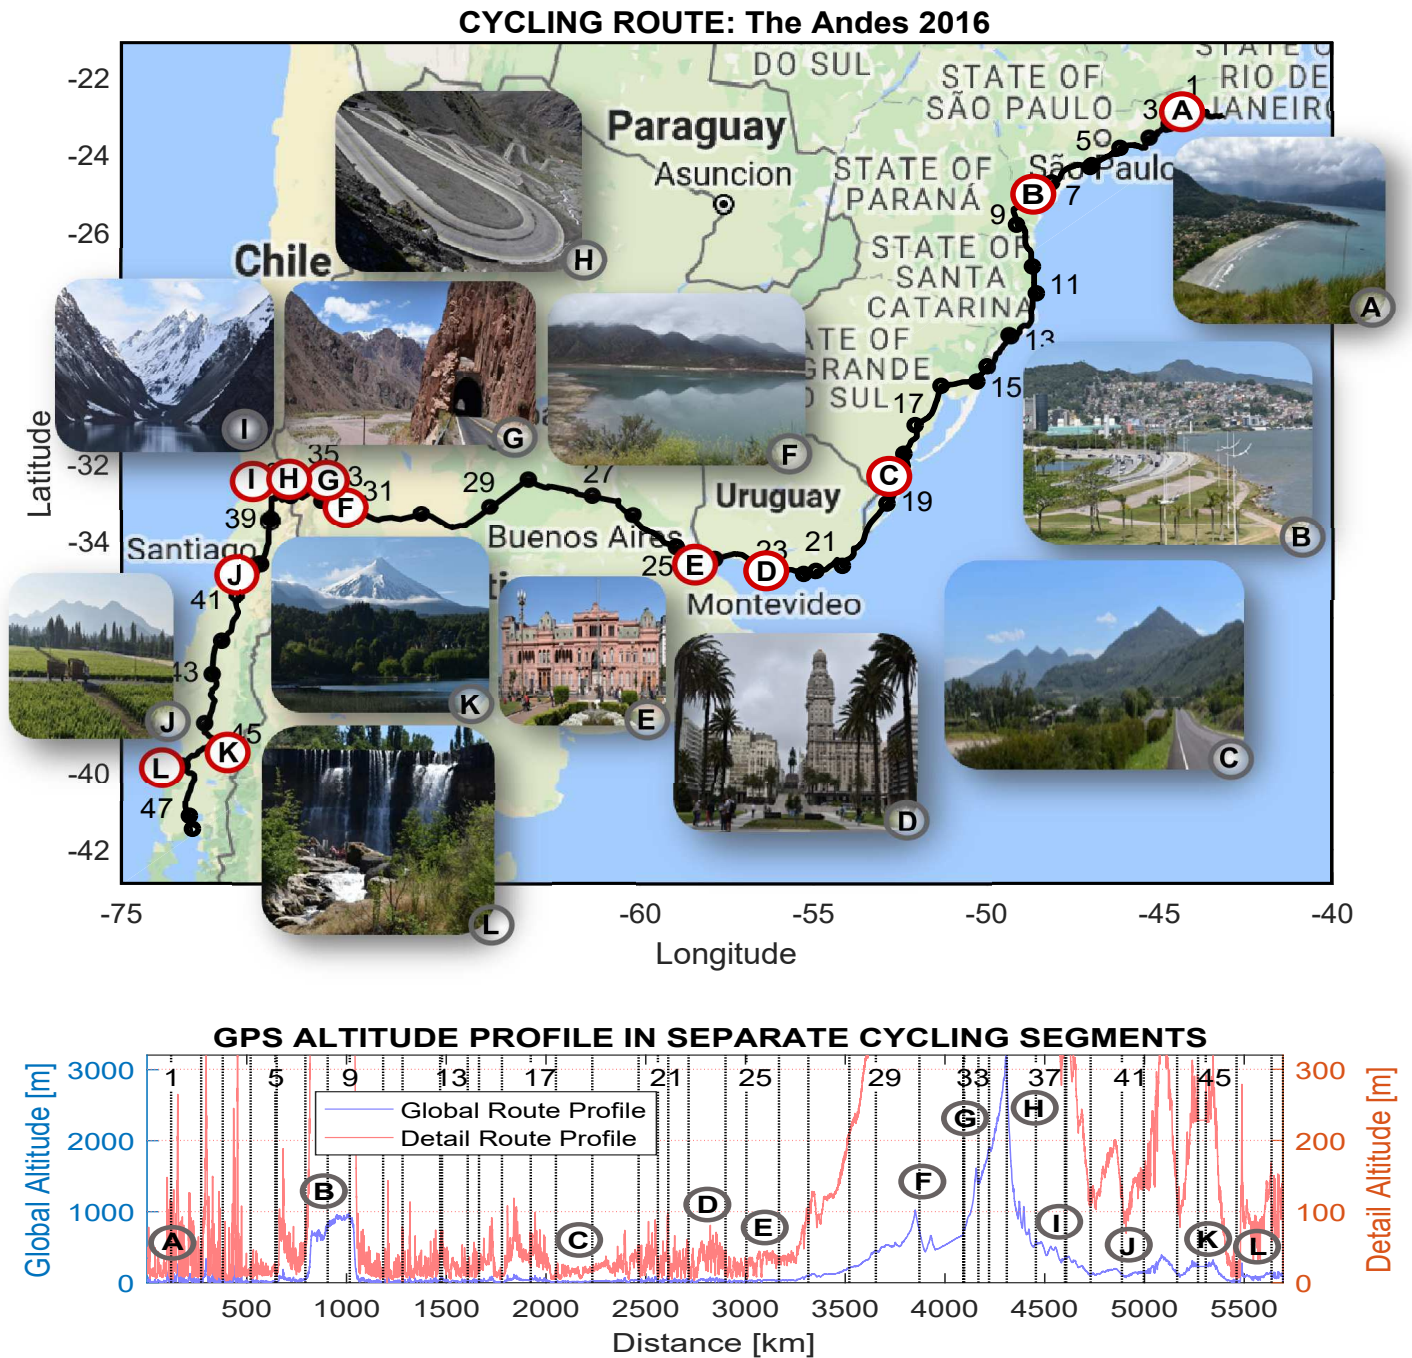

Table 1: Description of cycling segments across the Andes mountains recorded by the GPS system during the period from 20-10-2016 to 9-12-2016 presenting the length, average speed, elevation gain, and temperature in each cycling segment.

| Segment | Date  | Location                | Length<br>[km] | Avg. Speed<br>[km/h] | Elev. Gain<br>[m] | Avg. Temp.<br>[deg C] |
|---------|-------|-------------------------|----------------|----------------------|-------------------|-----------------------|
| 1       | 20-10 | Rio de Janeiro          | 106.81         | 16.42                | 605               | 29.1                  |
| 2       | 21-10 | Mangaratiba             | 143.52         | 18.35                | 1378              | 22.6                  |
| 3       | 22-10 | Parati                  | 102.08         | 18.03                | 869               | 19.3                  |
| 4       | 23-10 | Caragatatuba            | 134.12         | 18.35                | 1320              | 23.7                  |
| 5       | 24-10 | Santos                  | 104.67         | 22.05                | 155               | 22.1                  |
| 6       | 24-10 | Peruibe                 | 5.71           | 19.15                | 3                 | 20.0                  |
| 7       | 25-10 | Peruibe                 | 132.59         | 23.01                | 756               | 22.4                  |
| 8       | 26-10 | Jacupiranga             | 106.81         | 18.02                | 1771              | 24.2                  |
| 9       | 27-10 | Bocaiúva do Sul         | 97.80          | 16.74                | 1190              | 19.1                  |
| 10      | 28-10 | Tijucas do Sul          | 153.82         | 20.60                | 959               | 22.5                  |
| 11      | 29-10 | Balneário Camboriú      | 92.41          | 17.87                | 522               | 23.5                  |
| 12      | 30-10 | Florianópolis           | 179.26         | 22.69                | 1116              | 25.0                  |
| 13      | 30-10 | Içara                   | 8.63           | 4.02                 | 71                | 20.4                  |
| 14      | 31-10 | Criciúma                | 121.55         | 23.66                | 575               | 25.6                  |
| 15      | 31-10 | Três Cachoeiras         | 54.86          | 24.46                | 260               | 26.9                  |
| 16      | 1-11  | Osório                  | 101.79         | 20.12                | 249               | 20.2                  |
| 17      | 2-11  | Canoas                  | 139.51         | 18.99                | 655               | 20.2                  |
| 18      | 3-11  | Cristal                 | 117.13         | 19.47                | 481               | 20.0                  |
| 19      | 4-11  | Capão do Leão           | 175.66         | 22.53                | 169               | 24.1                  |
| 20      | 5-11  | Santa Vitória do Palmar | 226.26         | 26.07                | 380               | 25.2                  |
| 21      | 6-11  | La Paloma               | 92.65          | 21.24                | 604               | 30.0                  |
| 22      | 6-11  | San Carlos              | 49.25          | 19.47                | 269               | 31.7                  |
| 23      | 7-11  | Piriapolis              | 96.56          | 20.60                | 420               | 22.3                  |
| 24      | 8-11  | Montevideo              | 180.10         | 23.82                | 902               | 21.5                  |
| 25      | 12-11 | Buenos Aires            | 90.06          | 17.86                | 284               | 28.2                  |
| 26      | 13-11 | Campana                 | 159.13         | 21.73                | 381               | 14.9                  |
| 27      | 14-11 | San Nicolas Estefeta    | 136.05         | 23.01                | 266               | 28.4                  |
| 28      | 14-11 | Canada de Gomez         | 198.93         | 25.59                | 280               | 30.1                  |
| 29      | 16-11 | Villa Maria             | 125.63         | 19.79                | 434               | 12.0                  |
| 30      | 17-11 | Rio Cuarto              | 209.50         | 21.89                | 838               | 21.4                  |
| 31      | 18-11 | Pozo Escondido          | 212.74         | 23.01                | 554               | 28.2                  |
| 32      | 19-11 | San Martin              | 0.19           | 12.23                | 0                 | 19.0                  |
| 33      | 19-11 | San Martin              | 4.02           | 21.40                | 8                 | 21.6                  |
| 34      | 20-11 | Mendoza                 | 65.74          | 16.74                | 913               | 23.9                  |
| 35      | 22-11 | Potrerosillos           | 50.26          | 17.70                | 707               | 21.6                  |
| 36      | 23-11 | Uspallata               | 77.28          | 16.09                | 1618              | 10.6                  |
| 37      | 24-11 | Cristo Redentor         | 131.61         | 20.28                | 752               | 28.1                  |
| 38      | 30-11 | Santiago                | 133.98         | 20.44                | 391               | 27.4                  |
| 39      | 30-11 | San Fernando            | 4.92           | 1.78                 | 29                | 25.7                  |
| 40      | 1-12  | San Fernando            | 113.96         | 21.57                | 224               | 24.4                  |
| 41      | 2-12  | Talca                   | 148.17         | 19.79                | 313               | 30.5                  |
| 42      | 3-12  | Chillan                 | 106.63         | 22.21                | 352               | 27.2                  |
| 43      | 4-12  | Los Angeles             | 163.43         | 20.44                | 1232              | 13.0                  |
| 44      | 5-12  | Temuco                  | 100.05         | 20.60                | 611               | 13.9                  |
| 45      | 6-12  | Alumine                 | 36.97          | 9.17                 | 227               | 18.2                  |
| 46      | 7-12  | Pucon                   | 149.59         | 19.96                | 689               | 20.8                  |
| 47      | 8-12  | Valdivia                | 164.01         | 18.19                | 955               | 20.1                  |
| 48      | 9-12  | Frutillar Bajo          | 54.86          | 17.38                | 1771              | 20.8                  |
